# Supplementary material for: Comparative effectiveness and safety between oxaliplatin-based and cisplatin-based therapy in advanced gastric cancer: A meta-analysis of randomized controlled trials
Source: PubMed Central journal article supplement (PMC5085192; doi:10.18632/oncotarget.9189), 2016-05-05
Supplement: oncotarget-07-34824-s001.pdf [file oncotarget-07-34824-s001.pdf]

# Comparative effectiveness and safety between oxaliplatin-based and cisplatin-based therapy in advanced gastric cancer: A meta-analysis of randomized controlled trials

## Supplementary Materials

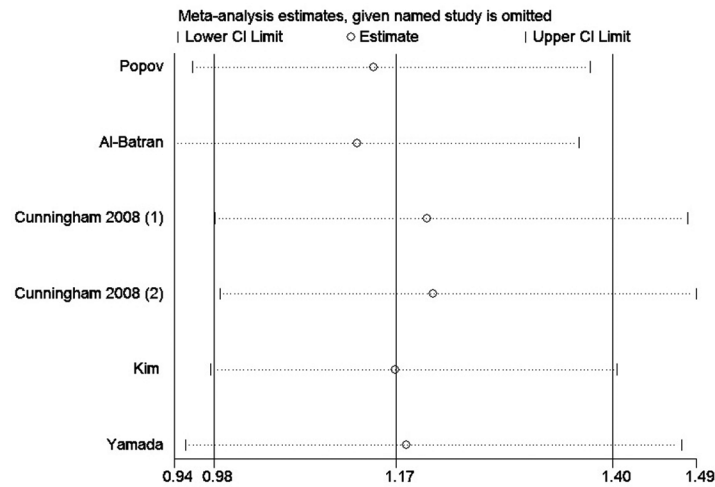

Supplementary Figure S1: Influence analysis of overall response rate.

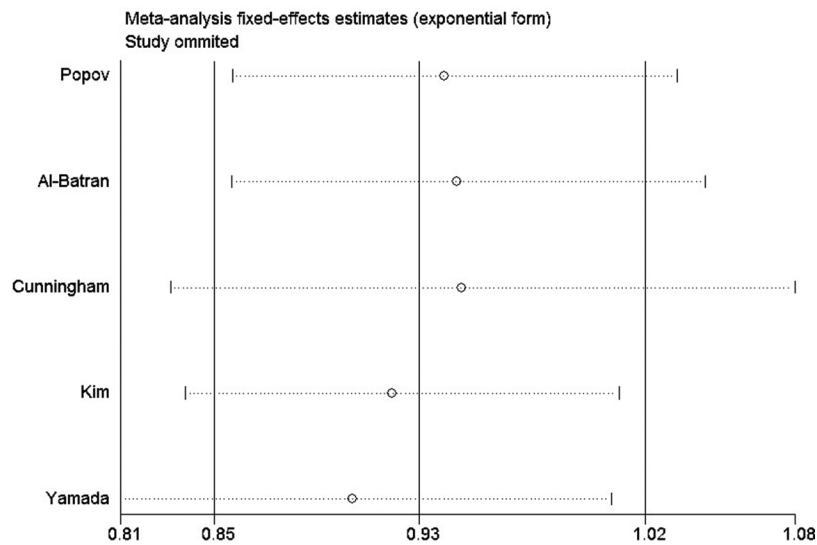

Supplementary Figure S2: Influence analysis of progression free survival.

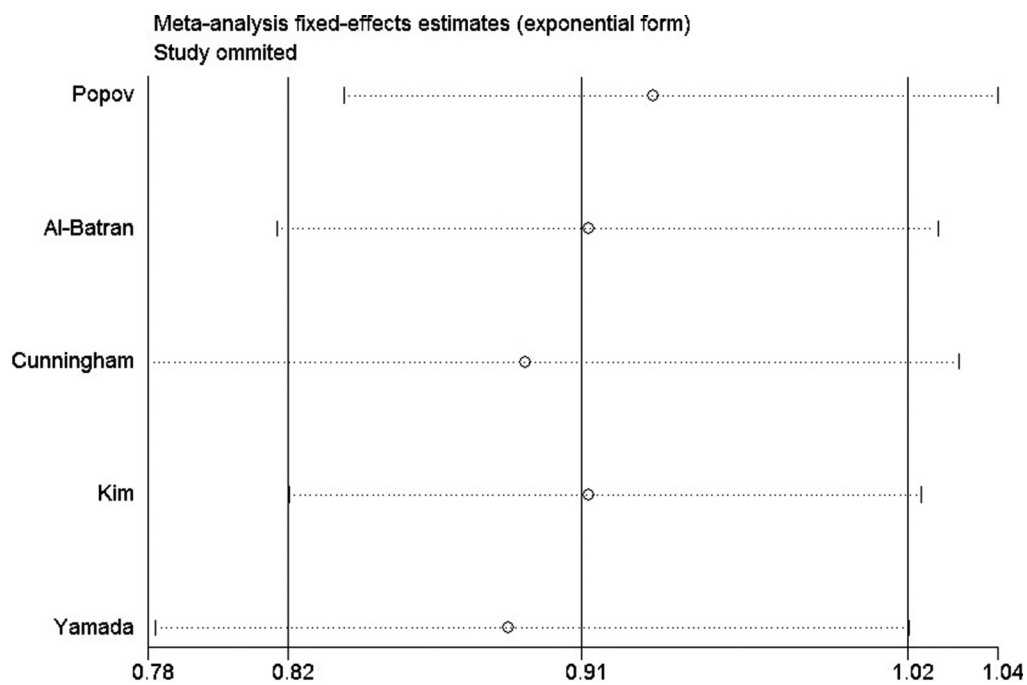

Supplementary Figure S3: Influence analysis of overall survival.
